# Supplementary material for: Approaching full-range selectivity control in CO2 hydrogenation to methanol and carbon monoxide with catalyst composition regulation
Source: Royal Society of Chemistry journal article supplement (doi:10.1039/d1qi00129a), 2021-01-01
Supplement: d1qi00129a1.pdf [file d1qi00129a1.pdf]

Electronic Supplementary Information (ESI)

**Approaching Full-Range Selectivity Control in CO<sub>2</sub> Hydrogenation to Methanol and Carbon Monoxide with Catalyst Composition Regulation**

*Libo Yao, Yanbo Pan, Dezhen Wu, Jialu Li, Rongxuan Xie and Zhenmeng Peng\**

Department of Chemical, Biomolecular, and Corrosion Engineering, The University of Akron, Akron, OH 44325, United States.

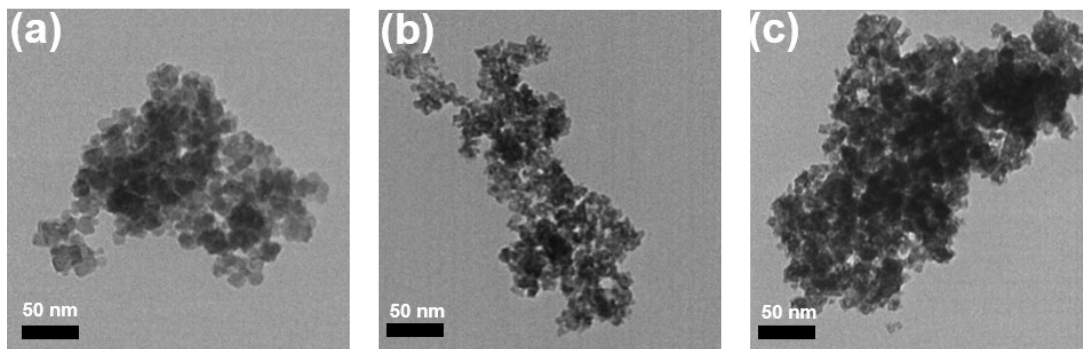

**Figure S1.** TEM images of P-regulated  $\text{In}(\text{OH})_3$ . (a) P-In-0. (b) P-In-3. (c) P-In-3.5.

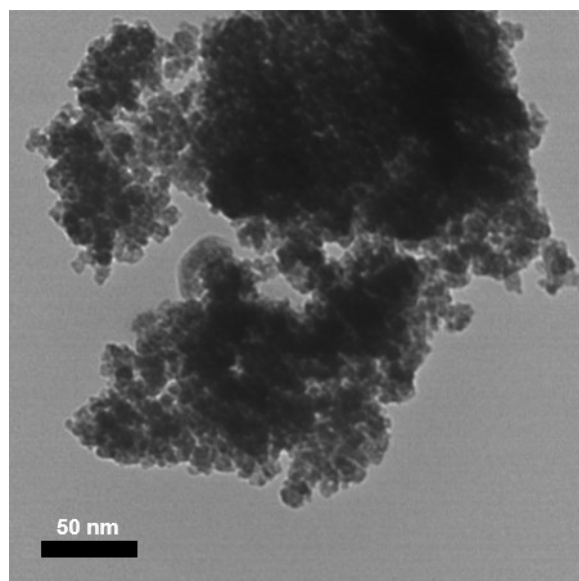

**Figure S2.** TEM image of P-regulated  $\text{In}_2\text{O}_3$  (P-In-2).

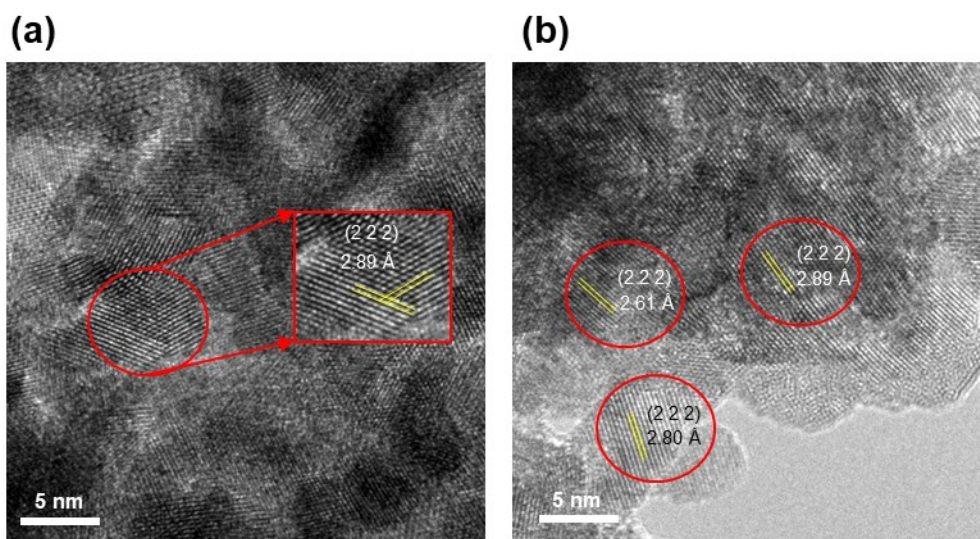

**Figure S3.** HR-TEM images for P-regulated materials. (a) P-In-0, (b) P-In-3.5

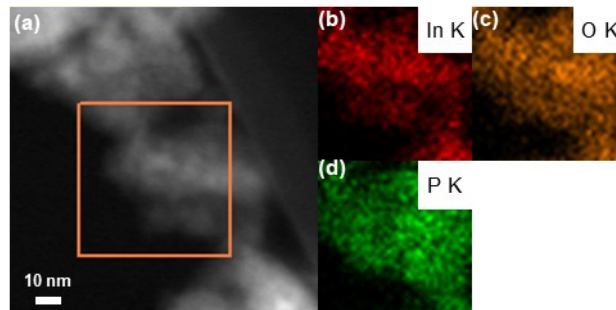

**Figure S4.** TEM EDX mapping images for P-regulated  $\text{In}_2\text{O}_3$  (P-In-3.5). (a) Scanned mapping region. (b)-(d) Mapping images for In, O and P.

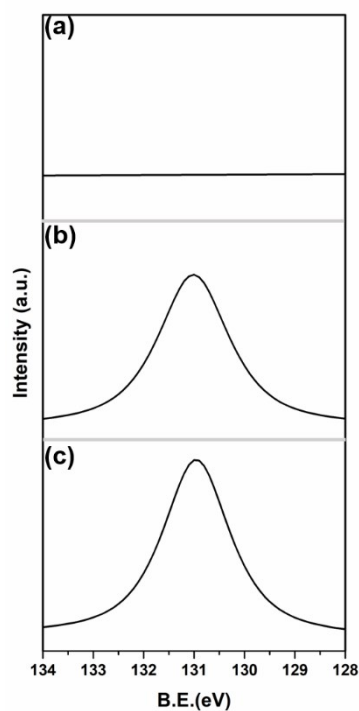

**Figure S5.** P 2p XPS spectra for a, P-In-0, b, P-In-2 and c, P-In-3.5 samples.

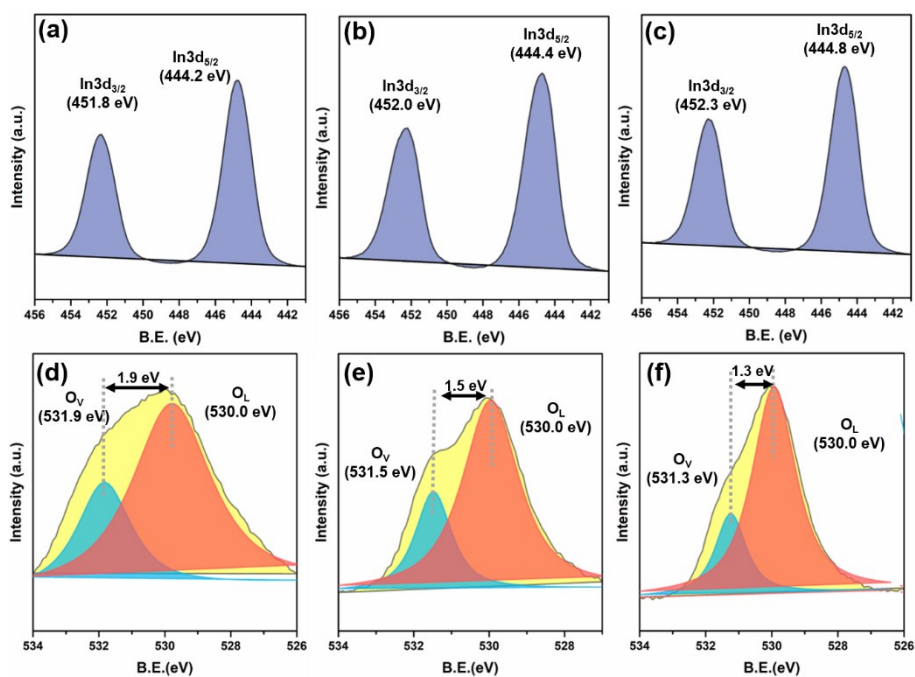

**Figure S6.** In 3d (a-c) and O 1s (d-f) XPS spectra for as-prepared P- regulated  $\text{In}_2\text{O}_3$ . (a,d) P-In-0, (b,e) P-In-2, (c,f) P-In-3.5.

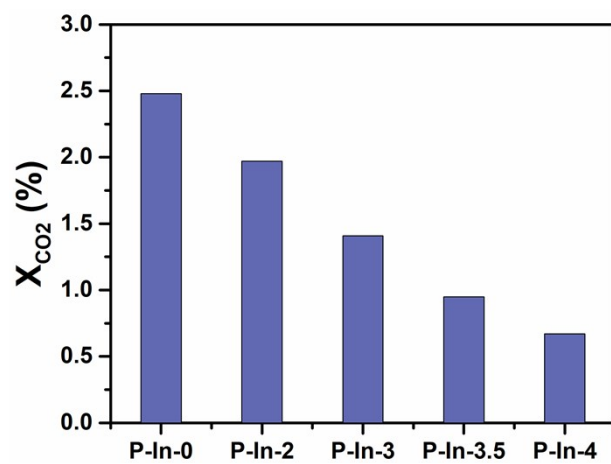

**Figure S7.** CO<sub>2</sub> conversion of In<sub>2</sub>O<sub>3</sub> with varying P content. Reaction carried out at T = 300

°C, P = 30 bar and GHSV = 18000 ml/(g<sub>cat</sub>·h).

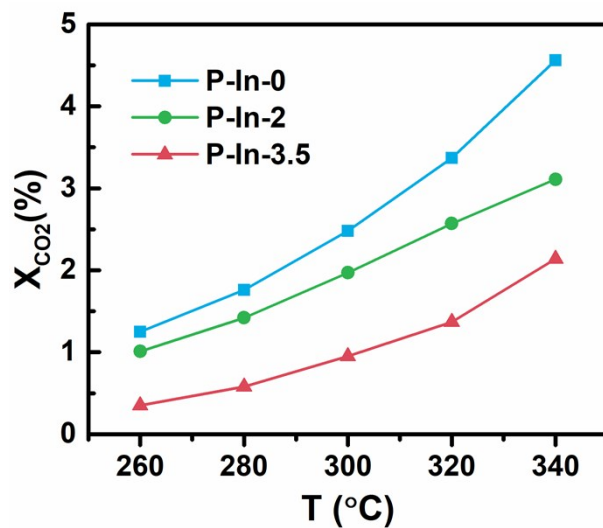

**Figure S8.** T-dependent CO<sub>2</sub> conversion (%) properties for P-In-0, P-In-2 and P-In-3.5 catalysts. Reaction carried out at P = 30 bar and GHSV = 18000 ml/(g<sub>cat</sub>·h).

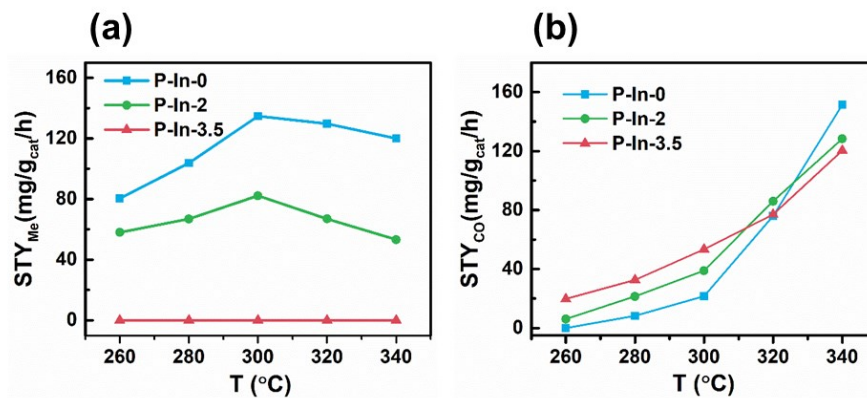

**Figure S9.** T-dependent space-time yield for methanol (a) and CO (b). Reaction carried out at

P = 30 bar and GHSV = 18000 ml/(g<sub>cat</sub>·h).



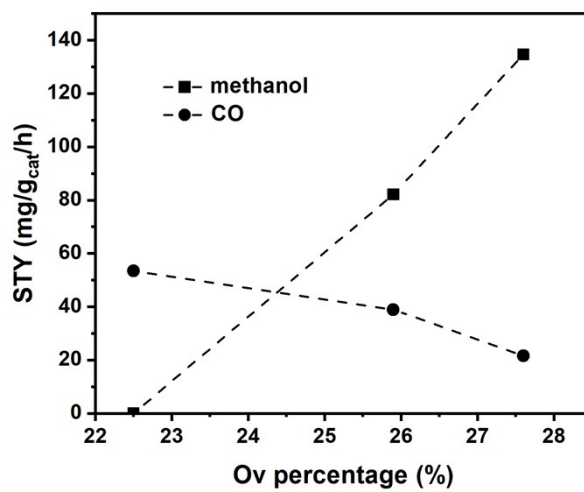

**Figure S10.** Relationship between abundance of oxygen vacancy (represented by Ov percentage obtained from XPS spectra) and space-time yield for methanol and CO.

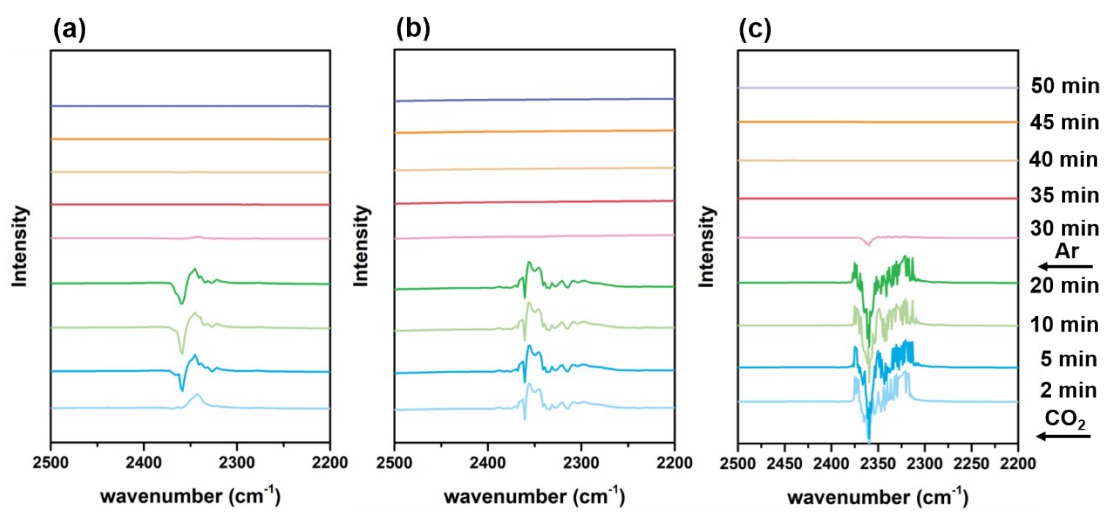

**Figure S11.** In situ DRIFTS spectra of CO<sub>2</sub> adsorption experiments on (a) P-In-0, (b) P-In-2 and (c) P-In-3.5

**Table S1.** Particle size of P- regulated In(OH)<sub>3</sub> and In<sub>2</sub>O<sub>3</sub> obtained from XRD spectra with

Scherrer equation.

| P/In ratio | Particle size (nm)    |                                  |
|------------|-----------------------|----------------------------------|
|            | P-In(OH) <sub>3</sub> | P-In <sub>2</sub> O <sub>3</sub> |
| P-In-0     | 20.81                 | 46.53                            |
| P-In-2     | 38.12                 | 46.53                            |
| P-In-3     | 38.12                 | 38.77                            |
| P-In-3.5   | 28.59                 | 37.22                            |
| P-In-5     | 28.01                 | 38.12                            |

**Table S2.** Integrated area of  $O_V$ ,  $O_L$  and  $O_{sum}$  obtained from XPS spectra.

|          | Condition | $O_V$    |      | $O_L$    |       | $O_{sum}$ |
|----------|-----------|----------|------|----------|-------|-----------|
|          |           | Position | Area | Position | Area  |           |
| P-In-0   | Fresh     | 531.9 eV | 5826 | 530.0 eV | 14740 | 20566     |
|          | Reduced   | 532.4 eV | 5378 | 530.0 eV | 14105 | 19482     |
| P-In-2   | Fresh     | 531.5 eV | 4382 | 530.0 eV | 10539 | 15921     |
|          | Reduced   | 531.5 eV | 4053 | 530.0 eV | 11564 | 15618     |
| P-In-3.5 | Fresh     | 531.3 eV | 4185 | 530.0 eV | 11938 | 16123     |
|          | Reduced   | 531.3 eV | 3903 | 530.0 eV | 13447 | 17350     |
